# Supplementary material
Source: PubMed Central journal article supplement (PMC4792657)

**CPGs with greatest DNAm differences  
MZ twin pairs  
(MHC region CpGs)**

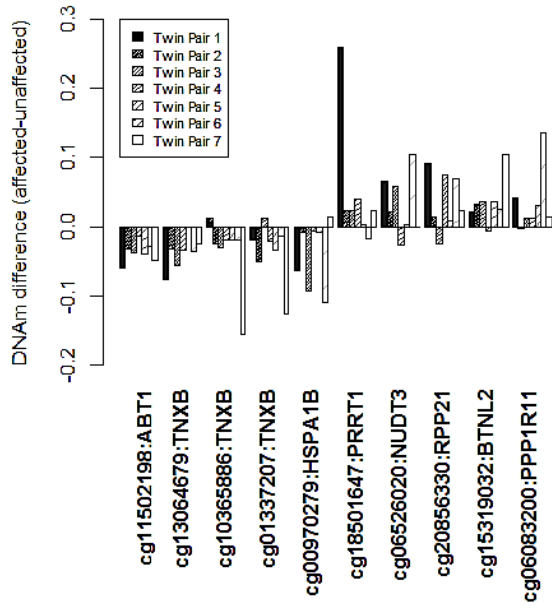

**CPGs with greatest DNAm differences  
NTS pairs  
(MHC region CpGs)**

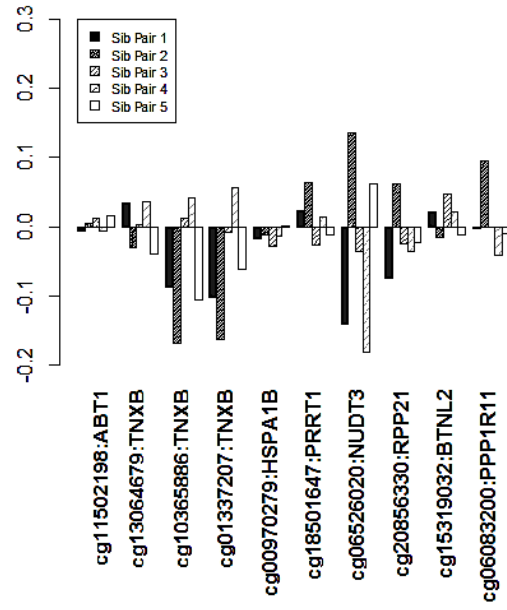

**(Non-MHC T1D-associated CpGs)**

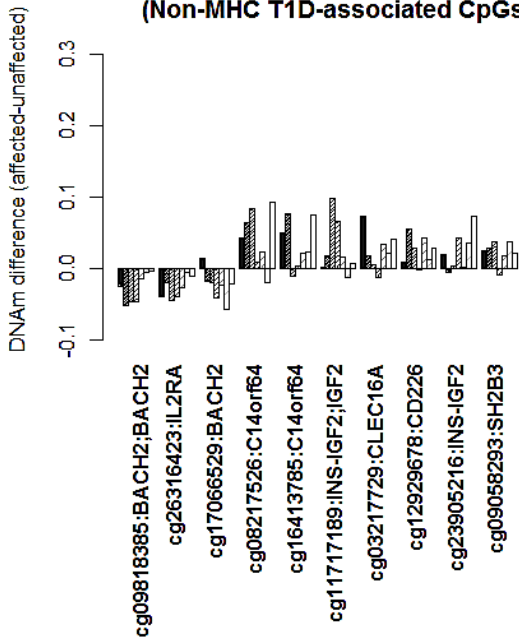

**(Non-MHC T1D-associated CpGs)**

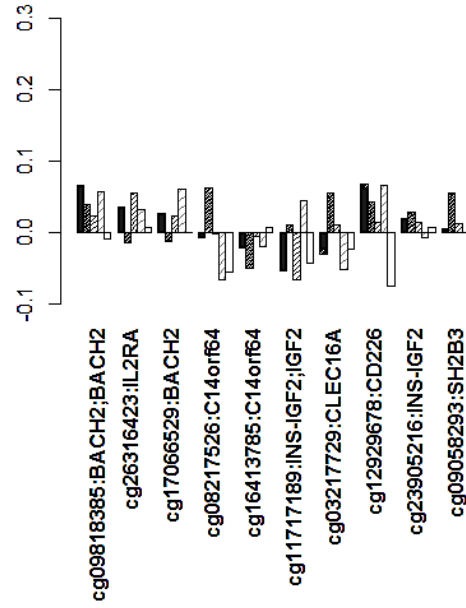

**(Epigenome CpGs)**

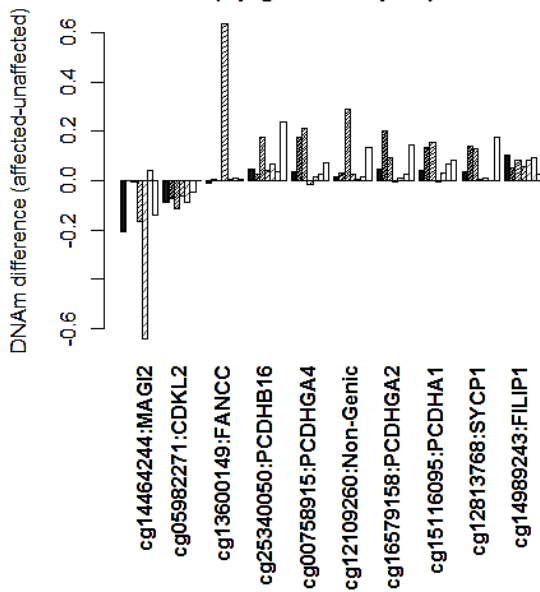

**(Epigenome CpGs)**

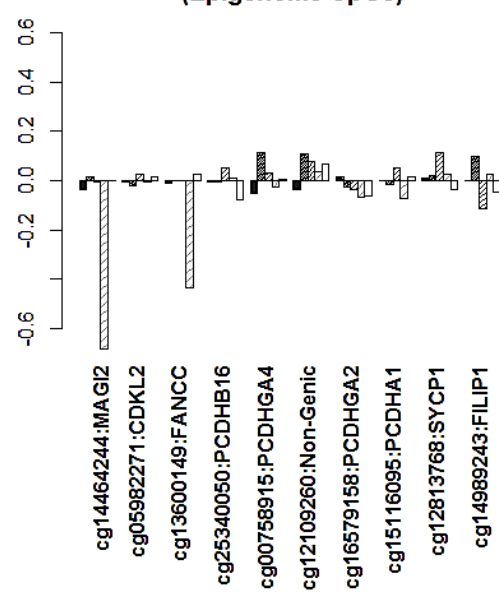

Supplement: NIHMS750793-supplement-2.pdf [file NIHMS750793-supplement-2.pdf]
